# Supplementary material for: Influence of current, spark on-time and off-time on electrode wear during EDM of mild steel
Source: Royal Society of Chemistry journal article supplement (doi:10.1039/d2fo01105k), 2011-01-01
Supplement: d2fo01105k1.7z [file d2fo01105k1.7z]

## **supplementary information**

### **1. Electrophoretic gels and blots**

For your convenience, we have prepared the PDF of the information. Each experiment was repeated three times and named after the protein and number of times. The bands used for drawing are marked by red boxes.

The same information is also included in the zip file.

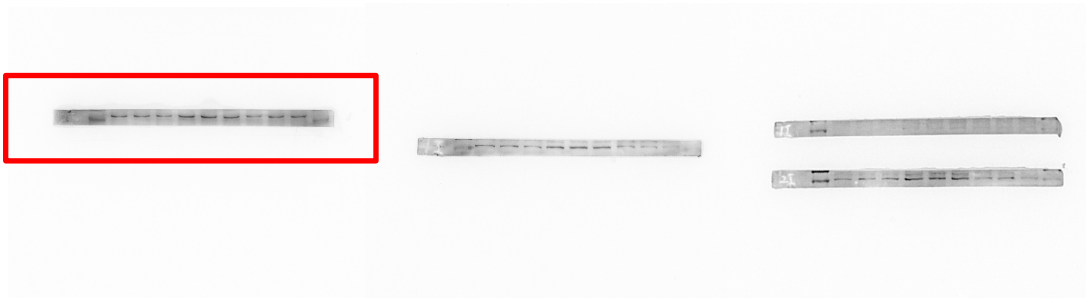

**S1 Col-I ---3 days**

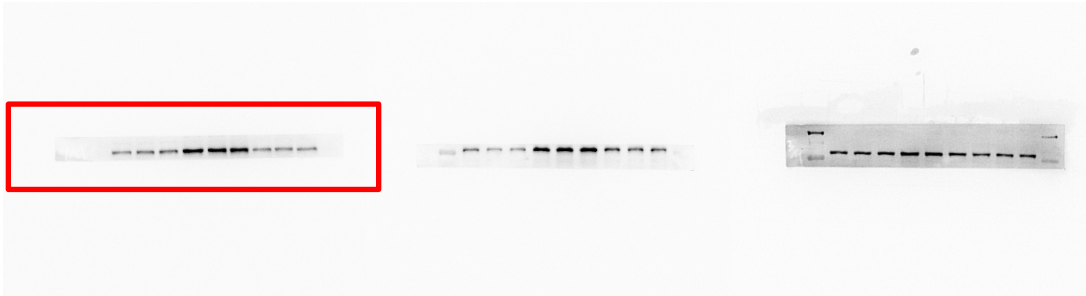

**S2 MMP-9 ---3 days**

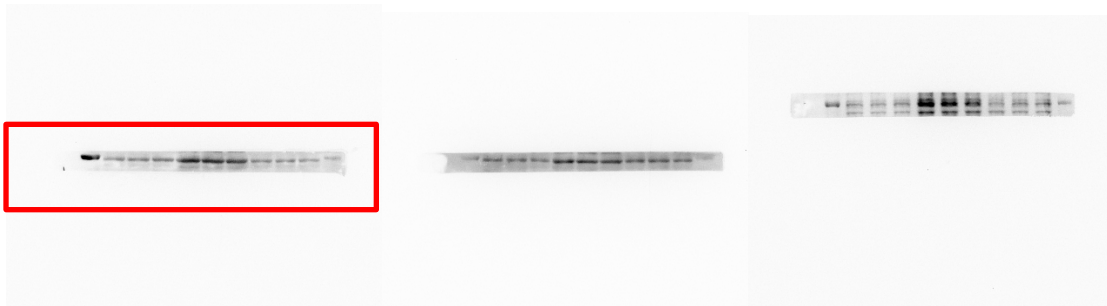

**S3 P-Smad3---3 days**

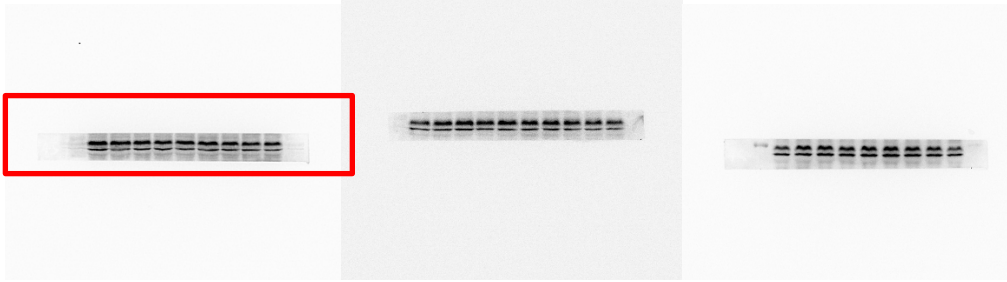

**S4 Smad3---3 days**

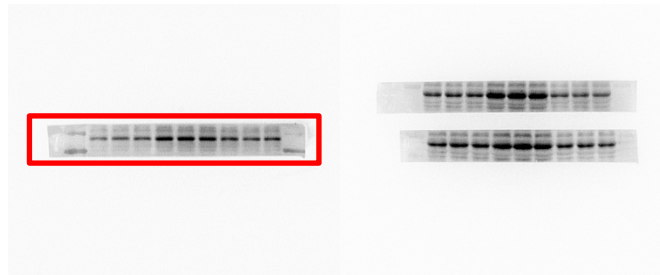

**S5 TGF-β1---3 days**

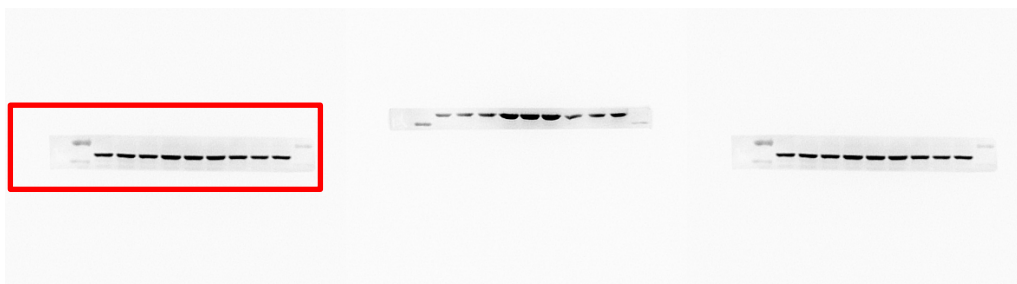

**S6 α-SMA---3 days**

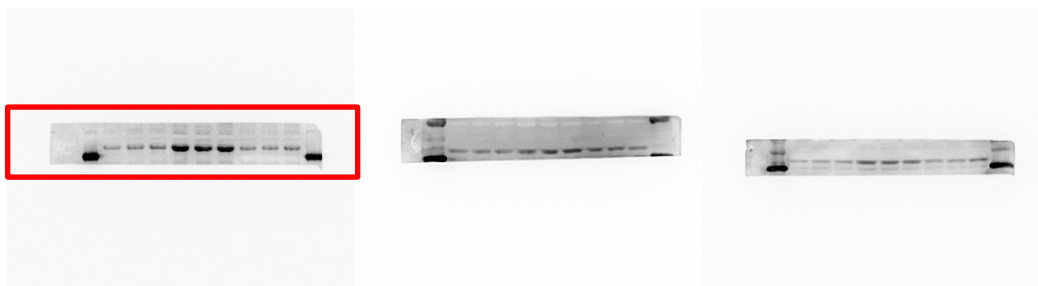

**S7 CTGF---3 days**

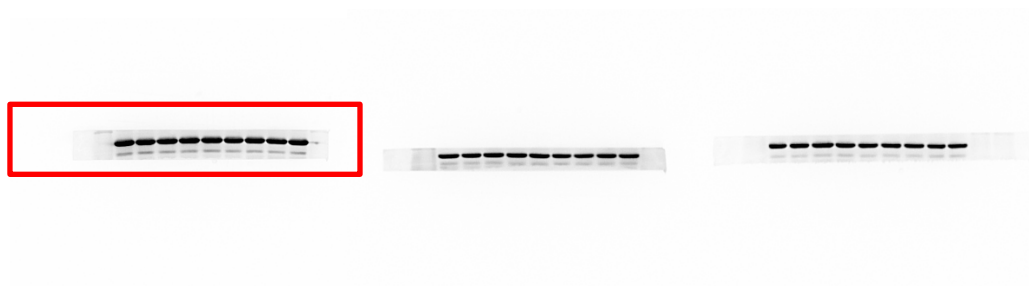

**S8 GAPDH---3 days**

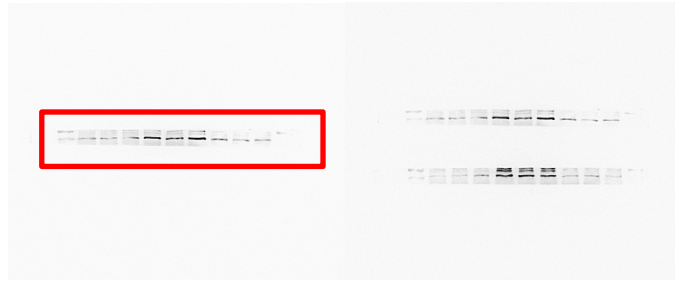

**S9 Col-I ---3 weeks**

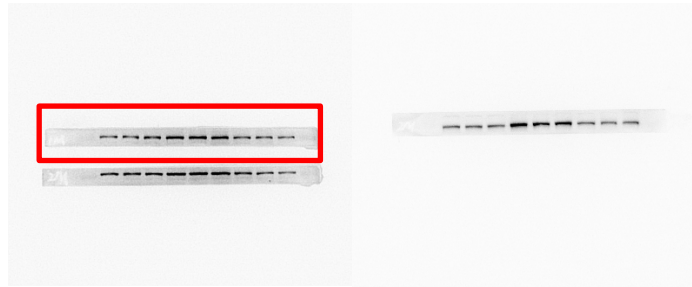

**S10 MMP-9 ---3 weeks**

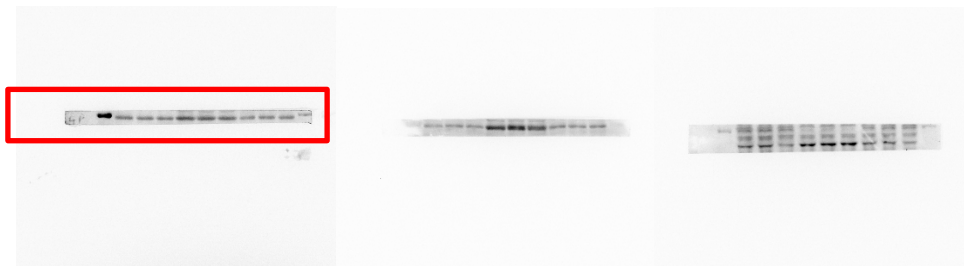

**S11 P-Smad3 ---3 weeks**

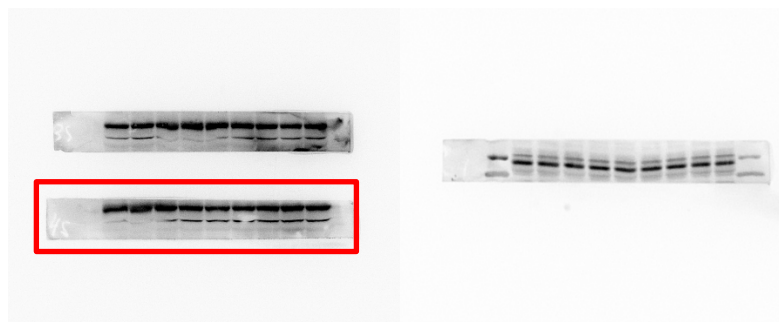

**S12 Smad3 ---3 weeks**

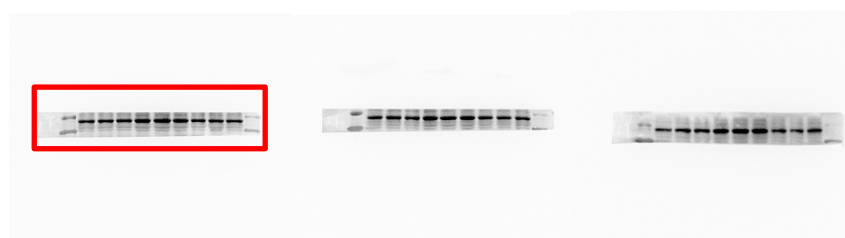

**S13 TGF-β1 ---3 weeks**

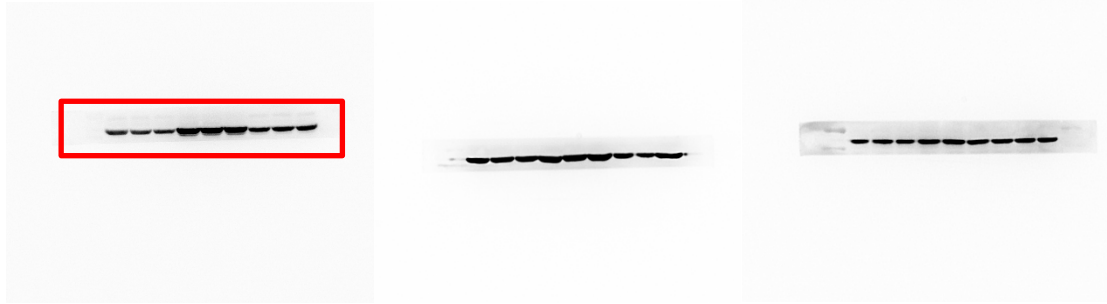

**S14  $\alpha$ -SMA ---3 weeks**

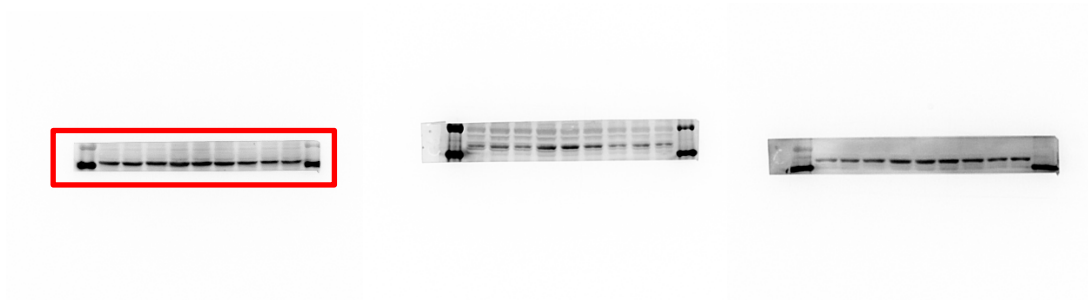

**S15 CTGF ---3 weeks**

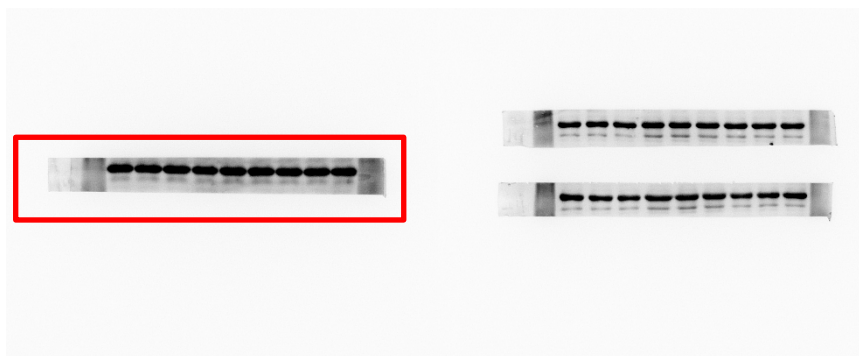

**S16 GAPDH ---3 weeks**

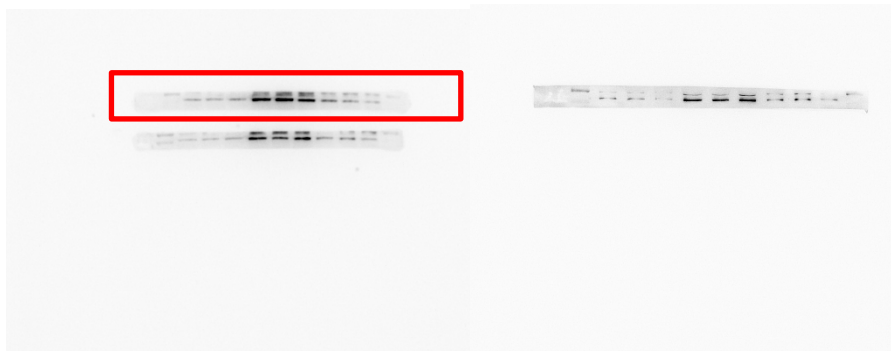

**S17 Col-I---adulthood**

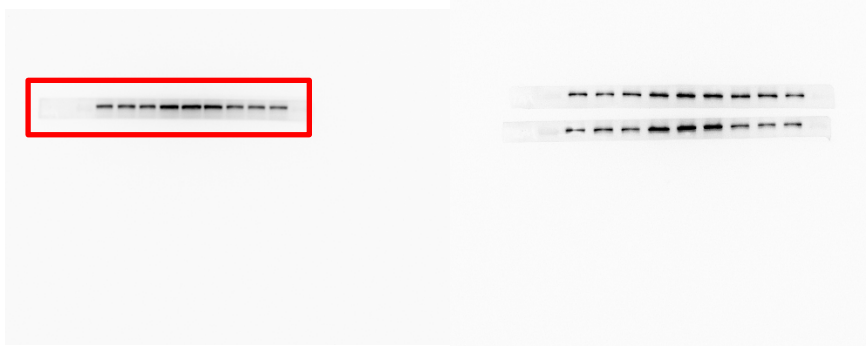

**S18 MMP-9---adulthood**

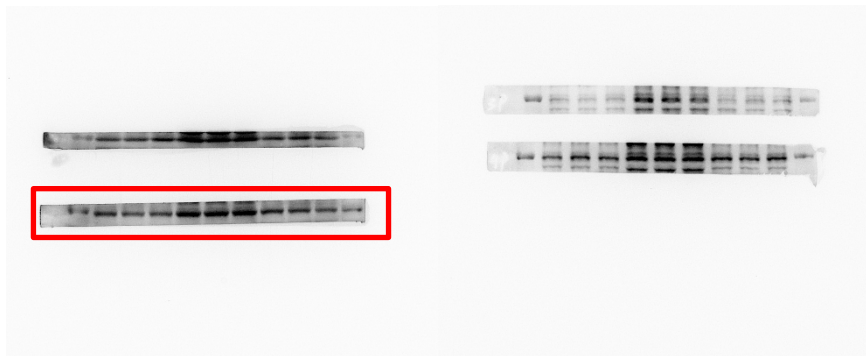

**S19 P-Smad3---adulthood**

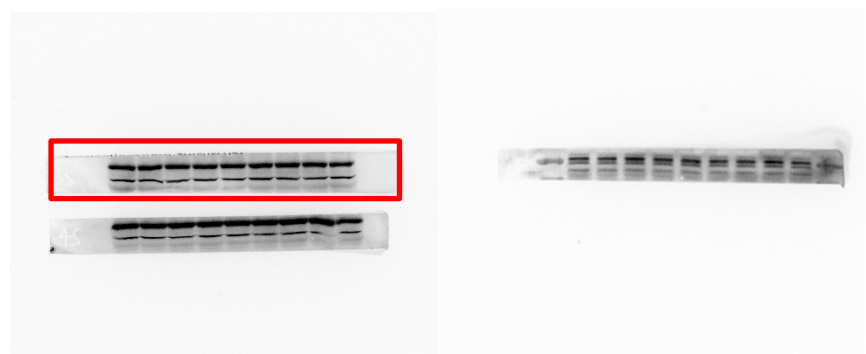

**S20 Smad3---adulthood**

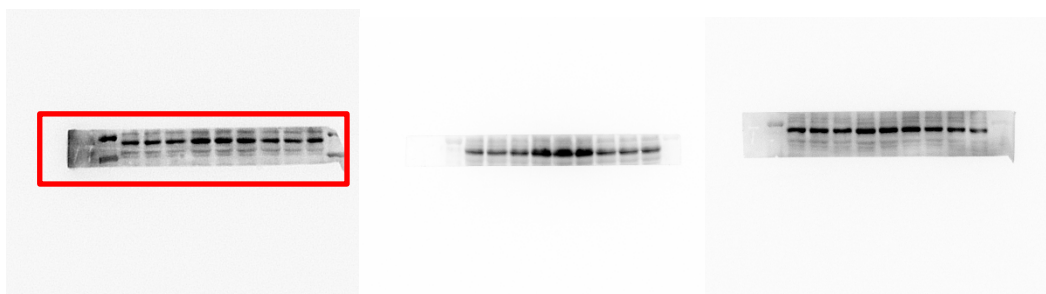

**S21 TGF-β---adulthood**

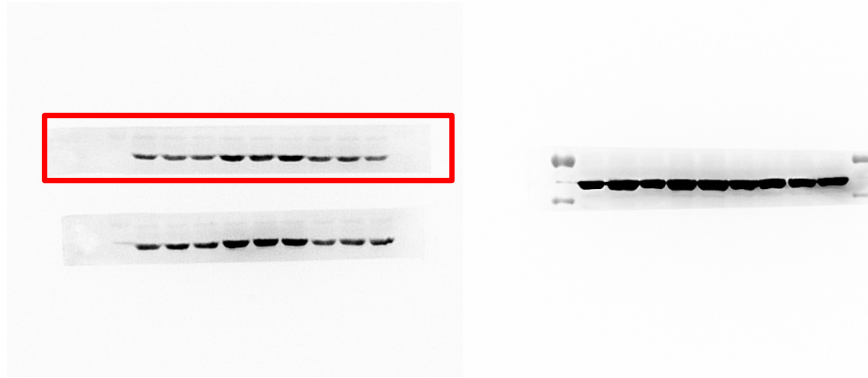

**S22  $\alpha$ -SMA---adulthood**

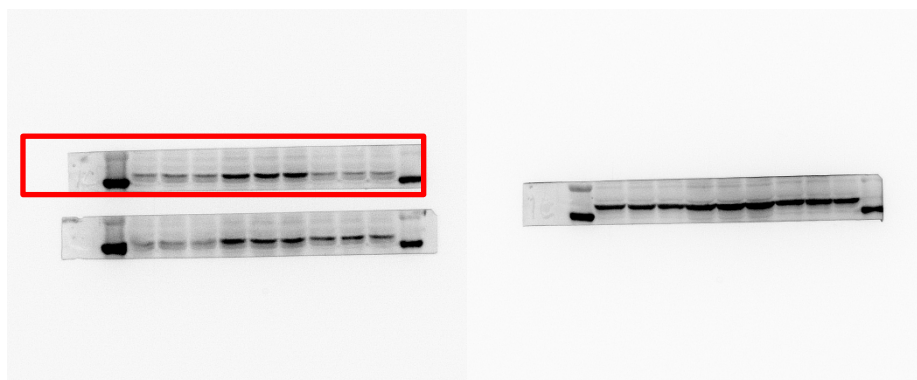

**S23 CTGF---adulthood**

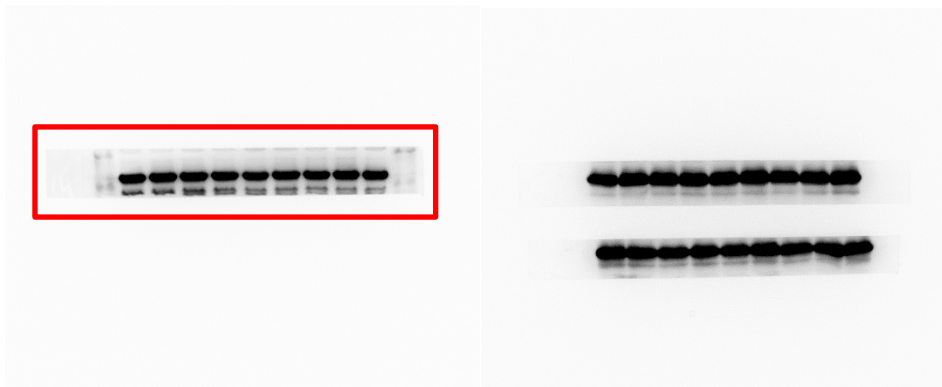

**S24 GAPDH---adulthood**

**2. Other data: presented in excel.**
